# Supplementary material for: Chlorinated Electron Acceptor Abundance Drives Selection of Dehalococcoides mccartyi (D. mccartyi) Strains in Dechlorinating Enrichment Cultures and Groundwater Environments
Source: PubMed Central journal article supplement (PMC5968391; doi:10.3389/fmicb.2018.00812), 2018-05-17
Supplement: Data_Sheet_1.pdf [file Data_Sheet_1.pdf]

## SUPPORTING INFORMATION

Chlorinated Electron Acceptor Abundance Drives Selection of *Dehalococcoides mccartyi* (*D. mccartyi*) Strains in Dechlorinating Enrichment Cultures and Groundwater Environments

A. Pérez-de-Mora<sup>1,2</sup> A. Lacourt<sup>1</sup>, M.L. McMaster<sup>3</sup>, X. Liang<sup>1</sup>, S.M. Dworatzek<sup>4</sup>, E.A. Edwards<sup>1</sup>

<sup>1</sup> Dept. of Chemical Engineering and Applied Chemistry, University of Toronto, 200 College St., Toronto, ON M5S 3E5N, Canada

<sup>2</sup> Research Unit Analytical Biogeochemistry, Dept. of Environmental Sciences, Helmholtz Zentrum München, Ingolstädterlandstr. 1, 85764 Neuherberg, Germany

<sup>3</sup> Geosyntec Consultants, Guelph, ON, Canada

<sup>4</sup> SiREM, Guelph, ON, Canada

## TABLE OF CONTENTS

|                                                                                                                                                                                     |         |
|-------------------------------------------------------------------------------------------------------------------------------------------------------------------------------------|---------|
| <b>Table S1.</b> Summary of cultures investigated -----                                                                                                                             | Page 3  |
| <b>Table S2.</b> Summary of <i>rdhA</i> genes in the mixed dechlorinating culture KB-1 -----                                                                                        | Page 4  |
| <b>Table S3.</b> List of <i>rdhA</i> targets (and OG numbers) and primer pairs for qPCR -----                                                                                       | Page 5  |
| <b>Table S4.</b> Primer – Analysis of sequence mismatches -----                                                                                                                     | Page 6  |
| <b>Table S5.</b> qPCR standard curves -----                                                                                                                                         | Page 7  |
| <b>Table S6.</b> qPCR data for Figure 2a (U of T cultures) of the main document -----                                                                                               | Page 8  |
| <b>Table S7.</b> qPCR data for Figure 2b (Sirem Cultures) of the main document -----                                                                                                | Page 9  |
| <b>Table S8.</b> qPCR data for Figure 3 (field sites) of the main document -----                                                                                                    | Page 10 |
| <b>Table S9.</b> Detection limits for all qPCR data -----                                                                                                                           | Page 11 |
| <b>Figure S1.</b> Sketch of the ISSO site in Canada -----                                                                                                                           | Page 12 |
| <b>Figure S2.</b> Sketch of the Sabre site in the UK -----                                                                                                                          | Page 13 |
| <b>Figure S3.</b> Phylogenetic tree based on the nucleotide sequences of the <i>rdhA</i> genes<br>of <i>Dehalococcoides</i> strains and the mixed dechlorinating culture KB-1 ----- | Page 14 |
| <b>References</b> -----                                                                                                                                                             | Page 15 |

**Table S1.** Summary of cultures investigated for the presence of both *Dehalococcoides* and *rdhA* genes.

| Culture/KB1 enrichment | Main dechlorinating organism* | Sampling dates          | e- donor       | e- acceptor | Main reaction  | Feeding                                      | Target conc. Of electron acceptor/<br>Vol. liquid/<br>Vol. headspace |
|------------------------|-------------------------------|-------------------------|----------------|-------------|----------------|----------------------------------------------|----------------------------------------------------------------------|
| TCE/M_1998_Parent      | <i>Dhc</i> & <i>Geo</i>       | 11-Jan-11               | M              | TCE         | TCE to ETH     | 400 $\mu$ L 5:1 stock (M/TCE)                | 0.68 mmol L <sup>-1</sup><br>1.6L/0.4L                               |
| TCE/M_1999             | <i>Dhc</i> & <i>Geo</i>       | 25-Oct-11               | M              | TCE         | TCE to ETH     | 400 $\mu$ L 5:1 stock (M/TCE)                | 0.68 mmol L <sup>-1</sup><br>1.6L/0.4L                               |
| TCE/M_2010             | <i>Dhc</i> & <i>Geo</i>       | spring 2011             | M              | TCE         | TCE to ETH     | 30 $\mu$ L 5:1 stock (M/TCE)                 | 0.68 mmol L <sup>-1</sup><br>0.2L/0.05L                              |
| TCE/ME_2001_SiREM      | <i>Dhc</i> & <i>Geo</i>       | 2004, 05, 06, 07 and 09 | ME             | TCE         | TCE to ETH     | 4 mL 5:1 (M/TCE)<br>1mL E                    | 0.15-0.19 mmol L <sup>-1</sup><br>99L/1L                             |
| TCE/H2_2001            | <i>Dhc</i> & <i>Geo</i>       | 11-Jan-11/<br>25-Oct-11 | H <sub>2</sub> | TCE         | TCE to ETH     | 60 mL- 100 mL H <sub>2</sub> /15 $\mu$ L TCE | 0.19 mmol L <sup>-1</sup><br>0.8L/0.2L                               |
| cDCE/M_2001            | <i>Dhc</i>                    | 7-Jun-11/<br>25-Oct-11  | M              | cDCE        | cDCE to ETH    | 110 $\mu$ L 5:1 stock (M/cDCE)               | 0.46 mmol L <sup>-1</sup><br>1.7L/0.3L                               |
| cDCE/M_2003            | <i>Dhc</i>                    | 07-Jun-11               | M              | cDCE        | cDCE to ETH    | 50 $\mu$ L 5:1 stock (M/cDCE)                | 0.46 mmol L <sup>-1</sup> /<br>0.65L/0.35L                           |
| VC/M_2001              | <i>Dhc</i>                    | 25-Oct-11               | M              | VC          | VC to ETH      | 53 $\mu$ L/20 mL VC                          | 0.69 mmol L <sup>-1</sup><br>1L/0.2L                                 |
| VC/H2_2003-1           | <i>Dhc</i>                    | 11-Jan-11               | H <sub>2</sub> | VC          | VC to ETH      | 20 mL H <sub>2</sub> /4 mL VC                | 0.72 mmol L <sup>-1</sup><br>0.2L/0.25L                              |
| VC/H2_2003-2           | <i>Dhc</i>                    | 11-Jan-11/<br>25-Oct-11 | H <sub>2</sub> | VC          | VC to ETH      | 5 mL H <sub>2</sub> /1 mL VC                 | 0.16 mmol L <sup>-1</sup> /<br>0.2L/0.05L                            |
| VC/M_2004              | <i>Dhc</i>                    | 25-Oct-11               | M              | VC          | VC to ETH      | 5 $\mu$ L/2 mL VC                            | 0.69 mmol L <sup>-1</sup> /<br>0.12L/0.06L                           |
| 12DCA/M_2008_UT        | <i>Dhc</i>                    | 11-Jan-11/<br>25-Oct-11 | M              | 1,2-DCA     | 1,2-DCA to ETH | 46 $\mu$ L 5:1 stock (M/1,2-DCA)             | 0.2 mmol L <sup>-1</sup><br>1.5L/0.5L                                |
| 12DCA/ME_2010_SiREM    | <i>Dhc</i>                    | 7-Jun-11/<br>25-Oct-11  | ME             | 1,2-DCA     | 1,2-DCA to ETH | 50 $\mu$ L 5:5:1 stock (M/E/1,2-DCA)         | 1.26 mmol L <sup>-1</sup> /<br>0.2L /0.05L                           |

cDCE = cis-dichloroethene; DCA = dichloroethane; *Dhc* = *Dehalococcoides*; E = ethanol; ETH = Ethene; *Geo* = *Geobacter*; M = methanol; ME = methanol/ethanol; TCE = trichloroethene; VC = vinyl chloride. \*based on PCR, clone libraries and metagenome analysis. The name format for the enrichment cultures indicates electron acceptor amended/donor used\_year created (e.g. VC/M\_2001 is a VC and methanol enrichment culture first established in 2001 and VC/H2\_2003-2 is a second enrichment culture established in 2003 with VC and hydrogen). Cultures in grey were not used in this study, but are provided for completeness, as they are available for research and have been discussed in other publications.

**Table S2.** Compiled reductive dehalogenase sequences identified in the dechlorinating enrichment culture KB-1.

| Name in paper          | OG** | Previous name          | Name in Hug et al., 2013 <sup>1</sup> | Accession number | NCBI GI    | JGI locust Tag           | JGI/IMG name | metagenome contig ID |
|------------------------|------|------------------------|---------------------------------------|------------------|------------|--------------------------|--------------|----------------------|
| KB1_1                  | 6    | KB1_1                  | KB1_1 & KB13109_4*                    | DQ177506         | 77176847   | DCKB1_110270             | none         | none                 |
| KB1_2                  | 11   | KB1_2                  | KB1_2                                 | DQ177507         | 77176850   | DCKB1_110450             | 2013897470   | C3109                |
| KB1_3                  | 12   | KB1_3                  | KB1_3                                 | DQ177508         | 77176853   | DCKB1_11560              | 2013887593   | C299                 |
| KB1_4                  | 13   | KB1_4                  | KB1_4                                 | DQ177509         | 77176856   | DCKB1_110180             | 2013897443   | C3109                |
| KB1_5                  | 15   | KB1_5 (DET 1545)       | KB1_5                                 | DQ177510         | 77176859   | DCKB1_110110             | 2013897436   | C3109                |
| KB1_6 ( <i>bvcA</i> )  | 28   | KB1_6 ( <i>bvcA</i> )  | KB1_6                                 | DQ177511         | 77176862   | none                     | none         | FOFA22070            |
| KB1_7                  | 19   | KB1_7                  | KB1_7 & KB13241_7*                    | DQ177512         | 77176865   | DCKB1_114830             | none         | none                 |
| KB1_8                  | 17   | KB1_8                  | KB1_8                                 | DQ177513         | 77176868   | DCKB1_11540              | 2013887591   | C299                 |
| KB1_9                  | 17   | KB1_9                  | KB1_9                                 | DQ177514         | 77176871   | DCKB1_110210             | 2013897446   | C3109                |
| KB1_10                 | 34   | KB1_10                 | KB1_10 & KB13109_9*                   | DQ177515         | 77176874   | DCKB1_110480             | 2013897473   | C3109                |
| KB1_11                 | 37   | KB1_11                 | KB1_11 & KB13240_1*                   | DQ177516         | 77176877   | DCKB1_114790             | none         | C3240                |
| KB1_12                 | 18   | KB1_12                 | KB1_12                                | DQ177517         | 77176880   | DCKB1_110630             | 2013897488   | C3109                |
| KB1_13 ( <i>pceA</i> ) | 30   | KB1_13 ( <i>pceA</i> ) | KB1_13                                | DQ177518         | 77176883   | DCKB1_110540             | 2013897479   | C3109                |
| KB1_14 ( <i>vcrA</i> ) | 8    | KB1_14 ( <i>vcrA</i> ) | KB1_14                                | DQ177519         | 77176886   | DCKB1_96900              | 2013896112   | C2841                |
| KB1_15                 | 39   | C3241_1                | KB13241_1                             | KP085015         | 733372930  | DCKB1_115000             | 2013897921   | C3241                |
| KB1_16                 | 50   | C3241_2                | KB13241_2                             | KP085016         | 733372933  | DCKB1_115150             | 2013897936   | C3241                |
| KB1_17                 | 49   | C3241_3                | KB13241_3                             | KP085017         | 733372936  | DCKB1_115210             | 2013897942   | C3241                |
| KB1_18                 | 14   | C3241_4                | KB13241_4                             | KP085018         | 733372939  | DCKB1_115020             | 2013897923   | C3241                |
| KB1_19                 | 36   | C3241_5                | KB13241_5                             | KP085019         | 733372942  | DCKB1_115090             | 2013897930   | C3241                |
| KB1_20                 | 38   | C3241_6                | KB13241_6                             | KP085020         | 733372945  | DCKB1_114910             | 2013897912   | C3241                |
| KB1_21                 | 32   | C3241_8                | KB13241_8                             | KP085021         | 733372948  | DCKB1_114860             | 2013897907   | C3241                |
| KB1_22                 | 40   | KB1_22                 | KB1_22 & KB13109_7*                   | JX081249         | 393716494# | DCKB1_110600             | none         | none                 |
| KB1_23                 | 29   | C3107_1                | KB13107_1                             | KP085022         | 733372951  | DCKB1_107470             | 2013897169   | C3107                |
| KB1_24                 | 22   | C3107_2                | KB13107_2                             | KP085023         | 733372954  | DCKB1_107520             | 2013897174   | C3107                |
| KB1_25                 | 56   | C1024_1                | KB11024_1                             | KP085024         | 733372957  | DCKB1_37290              | 2013890159   | C1024                |
| KB1_26                 | 23   | C3108_1 (cons.synt)    | KB13108_1                             | KP085025         | 733372960  | DCKB1_107910             | 2013897212   | C3108                |
| KB1_27 ( <i>tceA</i> ) | 5    | C338_1 ( <i>tceA</i> ) | KB1338_1                              | KP085026         | 733372963  | DCKB1_14890              | 2013887924   | C338                 |
| KB1_28                 | 26   | KB1_group26            | n/a                                   | KP085027         | 733372966  | DCKB1_13760              | 2013887811   | C338                 |
| KB1_29 (partial)       | n/a  | KB1_F43012             | n/a                                   | KP085028         | 733372969  | DCKB1_297220             | 2013916109   | FOFA43012            |
| KB1_30 (partial)       | n/a  | KB1_F51719             | n/a                                   | KP085029         | 733372971  | DCKB1_319470             | 2013918333   | FOFA51719            |
| Geo_rdh                | 41   | KB-1_Geo_rdhase        | n/a                                   | JX081248         | 393716492# | DCKB1_87010; DCKB1_86980 | none         | Geo_RD               |

\*possibly two highly similar sequences (>99%) from different sequencing efforts as presented in reference (1) - Hug *et al.*, 2013.

\*\*OG: ortholog group number, as defined in reference (1)

cons.synt. = conserved syntenic; OG = Ortholog Group

#accession numbers reported in reference (2) - Tang *et al.*, 2013. Note that accession number for Geo\_RD in (2) was listed erroneously as 393716494, instead of 393716492.

**Table S3.** List of *rdhA* targets with corresponding OG and primer pairs for qPCR employed in this study. Unless specified otherwise, primers were specifically designed for this study.

| OTU/functional gene<br>(accession #)<br>Ortholog Group Number | Primer pair                                              | sequence                                                     | Annealing<br>(Celsius) | fragment<br>length<br>(bp) |
|---------------------------------------------------------------|----------------------------------------------------------|--------------------------------------------------------------|------------------------|----------------------------|
| <i>Dehalococcoides 16S rRNA</i><br>(AY146779.1)               | Dhc 1f <sup>(3)</sup><br>Dhc 264r <sup>(3)</sup>         | 5'-GATGAACGCTAGCGGCG-3'<br>5'-CCTCTCAGACCAGCTACCGATCGAA-3'   | 60                     | 264                        |
| KB1_1 (DQ177506)<br><b>OG10</b>                               | KB1_1_246f <sup>(4)</sup><br>KB1_1_336r <sup>(4)</sup>   | 5'-ATCGGAGCTGCACAAGTAGG-3'<br>5'-TCTTGTGAGCGGTGTCTTTG-3'     | 60                     | 91                         |
| KB1_4 (DQ177509)<br><b>OG13</b>                               | KB1_4_310f<br>KB1_4_642r                                 | 5'-GCTCTTAACGCAGGGGCAA-3'<br>5'-GCGGCTGGCATCTACAGG-3'        | 63                     | 333                        |
| KB1_5 (DQ177510)<br><b>OG15</b>                               | KB1_5_1017f <sup>(4)</sup><br>KB1_5_1137r <sup>(4)</sup> | 5'-GATGCAGGCATTTACCGTTT-3'<br>5'-GTCTCTTTCCTTCGGTCAG-3'      | 60                     | 121                        |
| KB1_6 ( <i>bvcA</i> ) (DQ177511)<br><b>OG28</b>               | KB1_6_318f <sup>(4)</sup><br>KB1_6_555r <sup>(4)</sup>   | 5'-ATTTAGCGTGGGCAAAACAG-3'<br>5'-CCTTCCCACCTTGGGTAT TT-3'    | 60                     | 238                        |
| KB1_11 (DQ177516)<br><b>OG37</b>                              | KB1_11_723f<br>KB1_11_943r                               | 5'-CCACCAATATCACCATACCTAA-3'<br>5'-ACCGGTGGGAATGAAACG-3'     | 59                     | 221                        |
| KB1_12 (DQ177517)<br><b>OG18</b>                              | KB1_12_804f<br>KB1_12_1041r <sup>(4)</sup>               | 5'-TTCATCACGACAGCTTGGTG-3'<br>5'-TTTGGGGGTCATAACTGCTC-3'     | 60                     | 238                        |
| KB1_14 ( <i>vcrA</i> ) (DQ177519)<br><b>OG8</b>               | KB1_14_642f <sup>(4)</sup><br>KB1_14_846r <sup>(4)</sup> | 5'-GAAAGCTCAGCCGATGACTC-3'<br>5'-TGGTTGAGGTAGGGTGAAGG-3'     | 60                     | 205                        |
| KB1_15 (KP085015)<br><b>OG39</b>                              | KB1_15_491f<br>KB1_15_847r                               | 5'-GTCCCGAAGAGACTACCGCT-3'<br>5'-TGCCAAGACCCTGATAGCCT-3'     | 66                     | 357                        |
| KB1_16 (KP085016)<br><b>OG50</b>                              | KB1_16_727f<br>KB1_16_955r                               | 5'-GCCAGCCCGATACGTGAACTG-3'<br>5'-GGAACCGGCGCTGAACTATGG-3'   | 65                     | 229                        |
| KB1_17 (KP085017)<br><b>OG49</b>                              | KB1_17_259f<br>KB1_17_590r                               | 5'-GTCCTTATAGAATACGCCCAGA-3'<br>5'-GTACCAATACAAGTCTCTCCAG-3' | 63                     | 332                        |
| KB1_18 (KP085018)<br><b>OG14</b>                              | KB1_18_414f<br>KB1_18_556r                               | 5'-GGCTTATCCTGGTATCGTA-3'<br>5'-AACCGATAAACATGGCAC-3'        | 57.5                   | 143                        |
| KB1_19 (KP085019)<br><b>OG36</b>                              | KB1_19_1086f<br>KB1_19_1283r                             | 5'-CCTAACCAACCGGGCAAT-3'<br>5'-CGCCAGCCGAGAAAACC-3'          | 54                     | 198                        |
| KB1_23 (KP085022)<br><b>OG29</b>                              | KB1_23_431f<br>KB1_23_636r                               | 5'-TTGGTCAGGGTTCGGTCA-3'<br>5'-TTCACCAACATTCAGGACTC-3'       | 57                     | 206                        |
| KB1_25 (KP085024)<br><b>OG56</b>                              | KB1_25_397f<br>KB1_25_613r                               | 5'-TGCGAAATGGGCGGGATG-3'<br>5'-GCACTGAAGGCCCGAATGTAC-3'      | 60                     | 216                        |
| KB1_27 ( <i>tceA</i> ) (KP085026)<br><b>OG5</b>               | tceA500f <sup>(5)</sup><br>tceA795r <sup>(5)</sup>       | 5'-TAATATATGCCGCCACGAATGG-3'<br>5'-ATCGTATACCAAGGCCCGAGG-3'  | 64                     | 296                        |
| <i>Geobacter 16S rRNA</i>                                     | Geo_73f <sup>(3)</sup><br>Geo_485r <sup>(3)</sup>        | 5'-CTTGCTCTTTCATTTAGTGG-3'<br>5'-AAGAAAACCGGGTATTAA CC-3'    | 66                     | 413                        |
| <i>Geobacter_rdhA</i><br>(JX081248)                           | GeordhA_812f<br>GeordhA_1045r                            | 5'-AGCTGAGTCAGGGTTTGAGCC-3'<br>5'-CCATACGACTGCCTTACCCAT-3'   | 66                     | 234                        |

References: Duhamel and Edwards 2006; Waller *et al.* 2005; Fung *et al.* 2007; OG – ortholog group

**Table S4.** Mismatches between primers and sequences in Ortholog Groups (OG). Note that primers were designed to target KB1 sequences and not the OG groups.

| OTU/functional gene                         | Primer pair                                              | primer specificity to OG group<br>number of primer-sequence mismatches                                                                  |
|---------------------------------------------|----------------------------------------------------------|-----------------------------------------------------------------------------------------------------------------------------------------|
| KB1_1<br>OG10 (7 sequences)                 | KB1_1_246f <sup>(4)</sup><br>KB1_1_336r <sup>(4)</sup>   | 4 mismatches – VS_1421, GY50_1427; 1 mismatch (rest of sequences)<br>3 mismatches – AY374245, btf_1481; 5 mismatches VS_1421, GY50_1427 |
| KB1_4<br>OG13 (9 sequences)                 | KB1_4_310f<br>KB1_4_642r                                 | 4 mismatches – VS_1430, GY50_1436<br>1 mismatches – VS_1430, GY50_1436                                                                  |
| KB1_5<br>OG15 (10 sequences)                | KB1_5_1017f <sup>(4)</sup><br>KB1_5_1137r <sup>(4)</sup> | 4 mismatches – DET_1545<br>1 mismatches – DET_1545, 2 mismatches – btf_1497, GY50_1443                                                  |
| KB1_6 ( <i>bvcA</i> )<br>OG28 (2 sequences) | KB1_6_318f <sup>(4)</sup><br>KB1_6_555r <sup>(4)</sup>   | 0 mismatches<br>0 mismatches                                                                                                            |
| KB1_11<br>OG37 (3 sequences)                | KB1_11_723f<br>KB1_11_943r                               | 0 mismatches<br>0 mismatches                                                                                                            |
| KB1_12<br>OG18 (3 sequences)                | KB1_12_804f<br>KB1_12_1041r <sup>(4)</sup>               | 5 mismatches GY50_1408<br>3 mismatches GY50_1408                                                                                        |
| KB1_14 ( <i>vcrA</i> )<br>OG8 (4 sequences) | KB1_14_642f <sup>(4)</sup><br>KB1_14_846r <sup>(4)</sup> | 0 mismatches<br>1 mismatches all four sequences                                                                                         |
| KB1_15<br>OG39 (5 sequences)                | KB1_15_491f<br>KB1_15_847r                               | 0 mismatches<br>0 mismatches                                                                                                            |
| KB1_16<br>OG50 (3 sequences)                | KB1_16_727f<br>KB1_16_955r                               | 0 mismatches<br>0 mismatches                                                                                                            |
| KB1_17<br>OG49 (3 sequences)                | KB1_17_259f<br>KB1_17_590r                               | 0 mismatches<br>0 mismatches                                                                                                            |
| KB1_18<br>OG14 (6 sequences)                | KB1_18_414f<br>KB1_18_556r                               | 0 mismatches<br>0 mismatches                                                                                                            |
| KB1_19<br>OG36 (3 sequences)                | KB1_19_1086f<br>KB1_19_1283r                             | 0 mismatches<br>0 mismatches                                                                                                            |
| KB1_23<br>OG29 (4 sequences)                | KB1_23_431f<br>KB1_23_636r                               | 1 mismatch – DET_0235; 3 mismatches – GY50_0087<br>4 mismatches – GY50_0087; 7 mismatches - DET 0235                                    |
| KB1_25<br>OG56 (2 sequences)                | KB1_25_397f<br>KB1_25_613r                               | 0 mismatches<br>0 mismatches                                                                                                            |
| KB1_27 ( <i>tceA</i> )<br>OG5 (3 sequences) | tceA500f <sup>(5)</sup><br>tceA795r <sup>(5)</sup>       | 0 mismatches<br>0 mismatches                                                                                                            |
| <i>Geobacter_rdhA</i>                       | GeordhA_812f<br>GeordhA_1045r                            | 0 mismatches<br>0 mismatches                                                                                                            |

References: Waller *et al.* 2005; Fung *et al.* 2007; OG – ortholog group

**Table S5.** Details of the standard curves generated for qPCR with the different primer pairs, including average slopes, Y-intercepts,  $R^2$  and their corresponding standard deviations.

| Target                      | m       |        | n       |       | R       |        | Eff     |       | N  |
|-----------------------------|---------|--------|---------|-------|---------|--------|---------|-------|----|
|                             | average | stdev  | average | stdev | average | stdev  | average | stdev |    |
| <i>Dhc 16S</i>              | -3.462  | 0.030  | 35.179  | 0.596 | 0.998   | 0.002  | 94.5    | 1.1   | 4  |
| <b>KB1_1</b>                | -3.225  | NA     | 34.180  | NA    | 0.997   | NA     | 104     | NA    | 1  |
| <b>KB1_4</b>                | -3.479  | 0.201  | 34.930  | 1.39  | 0.999   | 0.000  | 94.2    | 7.8   | 3  |
| <b>KB1_5</b>                | -3.515  | NA     | 35.063  | NA    | 0.999   | NA     | 92.5    | NA    | 1  |
| <b>KB1_6 (<i>bvcA</i>)</b>  | -3.488  | 0.016  | 35.520  | 0.373 | 0.9972  | 0.002  | 93.5    | 0.6   | 2* |
| <b>KB1_11</b>               | -3.427  | 0.082  | 35.215  | 0.596 | 0.999   | 0.000  | 95.8    | 3.1   | 3  |
| <b>KB1_12</b>               | -3.350  | 0.322  | 36.177  | 0.327 | 0.996   | 0.006  | 99.2    | 14    | 2* |
| <b>KB1_14 (<i>vcrA</i>)</b> | -3.381  | 0.142  | 35.280  | 1.727 | 0.998   | 0.001  | 97.7    | 5.7   | 2* |
| <b>KB1_15</b>               | -3.328  | 0.136  | 35.231  | 0.386 | 0.994   | 0.004  | 99.8    | 5.6   | 2* |
| <b>KB1_16</b>               | -3.353  | 0.126  | 35.405  | 1.000 | 0.998   | 0.001  | 96.2    | 4.7   | 3  |
| <b>KB1_17</b>               | -3.464  | 0.001  | 35.759  | 0     | 0.997   | 0.000  | 94.4    | 0.0   | 2* |
| <b>KB1_18</b>               | -3.333  | 0.043  | 34.086  | 1.829 | 0.998   | 0.002  | 99.5    | 1.8   | 2* |
| <b>KB1_19</b>               | -3.174  | 0.001  | 34.069  | 0.02  | 0.998   | 0.000  | 107     | 0.1   | 2* |
| <b>KB1_23</b>               | -3.442  | 0.094  | 34.936  | 0.109 | 0.997   | 0.001  | 95.3    | 3.5   | 3  |
| <b>KB1_25</b>               | -3.473  | 0.167  | 35.540  | 0.163 | 0.997   | 0.000  | 94.2    | 6.2   | 2* |
| <b>KB1_27 (<i>tceA</i>)</b> | -3.512  | NA     | 35.087  | NA    | 0.996   | NA     | 92.6    | NA    | 1  |
| <i>Geobacter 16S</i>        | -3.520  | NA     | 35.579  | NA    | 0.994   | NA     | 92.3    | NA    | 1  |
| <i>Geobacter_rdhA</i>       | -3.394  | 0.2382 | 35.161  | 0.784 | 0.997   | 0.0029 | 99.4    | 9.8   | 2* |

avg = average; *Dhc* = *Dehalococcoides*. Eff = efficiency; m = slope; n = Y-intercept;  $R^2$  = coefficient of determination; N = number of standard curves used for the calculations; NA = not applicable; stdev = standard deviation.

\* Note that when N = 2 the range, that is, the difference between the two values available was calculated instead of the standard deviation.

**Table S6.** Absolute qPCR gene copy numbers per L of culture for each *rdhA* gene used for the calculation of the *rdhA/Dhc* ratios of Figure 2a of the main manuscript. Note that values for the 16S rRNA of *Geobacter* strain KB-1 and the *Geobacter rdhA* gene for some of the cultures are also included, although they do not appear on Figure 2.

|                 | TCE/M<br>1999<br>jan11 | TCE/H2<br>2001<br>jan11 | TCE/ME<br>2001<br>SiREM<br>oct09 | TCE/M<br>1998<br>parent<br>oct11 | TCE/M<br>2010<br>mar11 | VC/H2<br>2003-1<br>jan11 | VC/H2<br>2003-2<br>jan11 | VC/H2<br>2003-2<br>oct11 | cDCE/M<br>2003<br>jun11 | cDCE/M<br>2001<br>jun11 | cDCE/M<br>2001<br>oct11 | 1,2DCA/<br>M<br>2008<br>UToct11 | 1,2DCA/<br>M<br>2008<br>UTjan11 | 1,2DCA/<br>ME<br>2010<br>SiREM |
|-----------------|------------------------|-------------------------|----------------------------------|----------------------------------|------------------------|--------------------------|--------------------------|--------------------------|-------------------------|-------------------------|-------------------------|---------------------------------|---------------------------------|--------------------------------|
| <i>Dhc 16S</i>  | 1.7E+8                 | 1.5E+9                  | 7.1E+8                           | 4.4E+10                          | 2.3E+10                | 3.9E+9                   | 1.3E+9                   | 1.3E+10                  | 1.2E+9                  | 1.3E+9                  | 6.9E+9                  | 1.2E+10                         | 5.5E+8                          | 2.2E+9                         |
| <b>KB1_25</b>   | 1.4E+6                 | 1.4E+6                  | ≤8.2E+5                          | 1.6E+9                           | 5.4E+8                 | ≤8.2E+5                  | ≤8.2E+5                  | ≤8.2E+5                  | ≤8.2E+5                 | ≤8.2E+5                 | ≤8.2E+5                 | 2.2E+10                         | 3.5E+8                          | 1.0E+9                         |
| <b>KB1_16</b>   | 1.9E+6                 | 1.8E+6                  | ≤8.7E+5                          | 1.0E+9                           | 6.6E+8                 | ≤8.7E+5                  | ≤8.7E+5                  | ≤8.7E+5                  | ≤8.7E+5                 | ≤8.7E+5                 | ≤8.7E+5                 | 1.4E+10                         | 3.8E+8                          | 1.2E+9                         |
| <b>KB1_17</b>   | ≤5.0E+5                | 5.0E+5                  | ≤5.0E+5                          | 3.4E+8                           | 2.8E+8                 | ≤5.0E+5                  | ≤5.0E+5                  | ≤5.0E+5                  | ≤5.0E+5                 | ≤5.0E+5                 | ≤5.0E+5                 | 3.9E+9                          | 1.5E+8                          | 5.3E+8                         |
| <b>KB1_19</b>   | 2.6E+6                 | 2.5E+6                  | 9.1E+5                           | 1.7E+9                           | 6.4E+8                 | 9.8E+6                   | 3.2E+6                   | 2.3E+07                  | ≤8.3E+5                 | ≤8.3E+5                 | ≤8.3E+5                 | 1.9E+10                         | 5.7E+8                          | 1.2E+9                         |
| <b>KB1_27</b>   | 3.5E+7                 | 3.9E+7                  | 3.7E+8                           | 1.8E+10                          | 1.0E+6                 | 2.5E+6                   | 8.5E+5                   | NA                       | 7.0E+5                  | 5.3E+5                  | NA                      | NA                              | 4.1E+8                          | 1.1E+9                         |
| <b>KB1_6</b>    | 1.1E+6                 | 3.0E+6                  | ≤1.0E+6                          | ≤1.0E+6                          | 3.9E+6                 | ≤1.0E+6                  | ≤1.0E+6                  | ≤1.0E+6                  | 5.5E+8                  | 4.1E+8                  | 4.1E+9                  | 1.2E+9                          | 2.1E+7                          | 5.3E+8                         |
| <b>KB1_15</b>   | 3.5E+6                 | 2.7E+6                  | 8.9E+5                           | 1.0E+9                           | 1.2E+9                 | 1.3E+10                  | 2.5E+9                   | 6.0E+9                   | 3.8E+8                  | 5.9E+8                  | 2.4E+9                  | 1.3E+10                         | 7.4E+8                          | 2.2E+9                         |
| <b>KB1_18</b>   | 3.7E+6                 | 1.3E+6                  | ≤1.0E+6                          | 1.2E+9                           | 7.5E+8                 | 6.5E+9                   | 2.4E+9                   | 4.6E+9                   | 1.4E+8                  | 3.0E+8                  | 1.3E+9                  | 1.5E+10                         | 6.7E+8                          | 1.2E+9                         |
| <b>KB1_5*</b>   | 4.1E+8                 | 1.6E+9                  | 7.9E+8                           | 5.0E+10                          | 1.6E+9                 | 1.0E+10                  | 2.9E+9                   | NA                       | 6.6E+8                  | 1.3E+8                  | NA                      | NA                              | 3.4E+8                          | 1.3E+9                         |
| <b>KB1_23</b>   | 3.1E+8                 | 9.4E+8                  | 5.3E+8                           | 3.5E+10                          | 2.2E+10                | 2.5E+9                   | 5.0E+8                   | 8.6E+9                   | 3.5E+7                  | 5.1E+5                  | 2.9E+6                  | 4.9E+8                          | 9.9E+6                          | 2.0E+8                         |
| <b>KB1_12</b>   | 4.2E+7                 | 6.0E+8                  | 2.2E+9                           | 5.4E+10                          | 6.0E+9                 | 6.3E+8                   | 6.8E+7                   | 1.4E+10                  | 2.2E+8                  | 4.3E+5                  | 9.1E+6                  | 1.8E+9                          | 3.6E+6                          | 6.5E+7                         |
| <b>KB1_4</b>    | 3.1E+8                 | 8.6E+8                  | 5.0E+8                           | 5.0E+10                          | NA                     | 8.3E+9                   | 3.1E+9                   | 1.4E+10                  | 4.1E+8                  | 2.9E+8                  | 1.3E+9                  | 1.0E+10                         | NA                              | NA                             |
| <b>KB1_11</b>   | 4.6E+7                 | 7.2E+8                  | 7.1E+7                           | 1.8E+9                           | 1.2E+9                 | 1.2E+10                  | 5.1E+9                   | 6.3E+09                  | 2.5E+8                  | 5.0E+8                  | 1.8E+9                  | 2.7E+8                          | 1.2E+7                          | 1.3E+7                         |
| <b>KB1_14</b>   | 7.9E+7                 | 5.8E+8                  | 7.1E+8                           | 4.7E+10                          | 8.7E+9                 | 7.1E+9                   | 9.7E+8                   | 2.8E+10                  | 7.4E+8                  | 7.4E+8                  | 8.0E+9                  | 7.1E+9                          | 7.9E+7                          | 6.2E+8                         |
| <b>KB1_1*</b>   | 5.7E+8                 | 3.2E+9                  | 1.0E+9                           | 1.1E+11                          | 2.1E+9                 | 1.9E+10                  | 5.4E+9                   | NA                       | 2.8E+8                  | 4.8E+8                  | 8.9E+9                  | NA                              | 5.2E+8                          | 2.4E+9                         |
| <i>Dhc 16S*</i> | 4.2E+8                 | 2.5E+9                  | 1.5E+9                           | 1.1E+11                          | 2.2E+9                 | 2.1E+10                  | 4.7E+9                   | NA                       | 2.7E+8                  | 4.9E+8                  | 1.3E+9                  | NA                              | 4.4E+8                          | 2.2E+9                         |
| <i>Geo 16S</i>  | NA                     | NA                      | 1.6E+8                           | 5.9E+9                           | NA                     | NA                       | ≤1.1E+6                  | ≤1.1E+6                  | NA                      | NA                      | ≤1.1E+6                 | ≤1.1E+6                         | NA                              | NA                             |
| <i>Geo rdh</i>  | 3.3E+7                 | 1.0E+9                  | 1.5E+8                           | 7.8E+9                           | 2.0E+9                 | ≤3.6E+5                  | ≤4.6E+5                  | ≤4.6E+5                  | ≤4.6E+5                 | ≤4.6E+5                 | ≤4.6E+5                 | ≤4.6E+5                         | ≤4.6E+5                         | ≤4.6E+5                        |

\*Absolute quantification for KB1\_1, KB1\_5 and KB1\_27 was conducted on a different date than for the rest of *rdhA* genes and thus values for these genes were referred to *Dhc* values of the corresponding date. *Dhc* = *Dehalococcoides*; NA = not analyzed; *Geo* = *Geobacter*; ≤ MDL value is equal to or lower than the method detection limit. KB1\_27 (*tceA*); KB1\_6 (*bvcA*); KB1\_14(*vcrA*).

*Note:* The difference between duplicate measurements was usually around 5% or less of absolute value of each duplicate measurement.



**Table S7.** Absolute qPCR gene copy numbers per L of culture for each *rdhA* used for Figure 2b of the main manuscript.

|                      | TCE/ME<br>2001 Sir<br>Feb 2004 | TCE/ME<br>2001 Sir<br>Jan 2005 | TCE/ME<br>2001 Sir<br>Mar 2006 | TCE/ME<br>2001 Sir<br>Apr 2007<br>SaBRE<br>inoculum | TCE/ME<br>2001 Sir<br>Oct 2009<br>ISSO<br>inoculum |
|----------------------|--------------------------------|--------------------------------|--------------------------------|-----------------------------------------------------|----------------------------------------------------|
| <i>Dhc 16S</i>       | 6.8E+10                        | 2.0E+11                        | 5.3E+10                        | 3.5E+10                                             | 7.1E+08                                            |
| <b>KB1_25</b>        | ≤8.2E+05                       | ≤8.2E+05                       | ≤8.2E+05                       | ≤8.2E+05                                            | ≤8.2E+05                                           |
| <b>KB1_16</b>        | ≤8.7E+05                       | ≤8.7E+05                       | ≤8.7E+05                       | ≤8.7E+05                                            | ≤8.7E+05                                           |
| <b>KB1_17</b>        | ≤5.0E+05                       | ≤5.0E+05                       | ≤5.0E+05                       | ≤5.0E+05                                            | ≤5.0E+05                                           |
| <b>KB1_19</b>        | 8.9E+07                        | 1.5E+08                        | 1.2E+08                        | 1.3E+08                                             | 9.1E+05                                            |
| <b>KB1_6/bvcA</b>    | 7.0E+07                        | 8.5E+09                        | 2.3E+09                        | 3.2E+08                                             | ≤1.0E+06                                           |
| <b>KB1_15</b>        | 4.5E+10                        | 1.9E+10                        | 6.7E+08                        | 7.6E+08                                             | 8.9E+05                                            |
| <b>KB1_18</b>        | 7.9E+10                        | 2.0E+10                        | 3.9E+08                        | 6.3E+08                                             | ≤1.0E+06                                           |
| <b>KB1_23</b>        | 6.0E+10                        | 2.6E+11                        | 4.7E+10                        | 3.7E+10                                             | 5.3E+08                                            |
| <b>KB1_12</b>        | 6.8E+10                        | 3.6E+11                        | 7.2E+10                        | 5.6E+10                                             | 2.2E+09                                            |
| <b>KB1_4</b>         | 6.0E+10                        | 2.1E+11                        | NA                             | 4.0E+10                                             | 5.0E+08                                            |
| <b>KB1_11</b>        | 9.6E+10                        | 1.3E+11                        | 1.5E+10                        | 2.6E+10                                             | 7.1E+07                                            |
| <b>KB1_14/vcrA</b>   | 2.7E+11                        | 6.1E+11                        | 9.7E+10                        | 7.5E+10                                             | 7.1E+08                                            |
| <i>Geobacter 16S</i> | 4.3E+09                        | 3.3E+10                        | 5.0E+09                        | 4.6E+09                                             | 1.6E+08                                            |
| <i>Geo_rdhA</i>      | 2.1E+10                        | 7.8E+10                        | 6.6E+09                        | 3.9E+09                                             | 1.5E+08                                            |

*Dhc* = 16S rRNA gene of *Dehalococcoides*; *Geo\_rdhA* = *Geobacter rdhA*; *Geobacter* = 16S rRNA gene of *Geobacter*; NA = not analyzed. ≤ MDL value is equal to or lower than the method detection limit. Note: The difference between duplicate measurements was usually around 5% or less of the absolute value of each duplicate measurement.

**Table S8.** Absolute qPCR gene copy numbers per L of groundwater or per L of culture (for KB-1 inoculum) for each *rdhA* gene from which *rdhA/Dhc* ratios for Figure 4 of the main manuscript were calculated.

| site                       | ISSO <sup>1</sup>                 | ISSO <sup>1</sup>                            | ISSO <sup>1</sup> | ISSO <sup>1</sup>                             | ISSO <sup>1</sup>                              | ISSO <sup>1,2</sup>           | SABRE <sup>1</sup> | SABRE <sup>1</sup>                    | SABRE <sup>1</sup>                               | SABRE <sup>1</sup>                                 | SABRE <sup>1</sup>                                | SABRE <sup>1,3</sup>                               | SABRE <sup>1,3</sup>                               |
|----------------------------|-----------------------------------|----------------------------------------------|-------------------|-----------------------------------------------|------------------------------------------------|-------------------------------|--------------------|---------------------------------------|--------------------------------------------------|----------------------------------------------------|---------------------------------------------------|----------------------------------------------------|----------------------------------------------------|
| sample                     | prebiost month 1                  | pre-bioaug month 18                          | KB-1 inoc.        | post-bioaug month 22                          | postbioaug month 30                            | SW70 month 0                  | KB-1 inoc.         | SW70 month 2                          | SW70 month 10                                    | SW70 month 15                                      | SW75 month 15                                     | effluent month 15                                  | influent month 15                                  |
| <b>Reme-diation status</b> | 2.5 mos. before start of biostim. | 15 mos. of biostim. and 1 mo. before bioaug. |                   | 19 mos. of biostim. and 3 mos. after bioaug.. | 27 mos. of biostim. and 11 mos. after bioaug.. | prior to biostim. and bioaug. |                    | 2 weeks after bioaug. and 1 mo. after | 8.5 mos. after bioaug. and 9 mos. after biostim. | 13.5 mos. after bioaug. and 14 mos. after biostim. | 13.5mos. after bioaug. and 14 mos. after biostim. | 13.5 mos. after bioaug. and 14 mos. after biostim. | 13.5 mos. after bioaug. and 14 mos. after biostim. |
| <i>Dhc 16S</i>             | 1.1E+6                            | 1.5E+6                                       | 7.1E+8            | 1.2E+6                                        | 5.9E+6                                         | ≤6.2E+5                       | 3.5E+10            | 1.4E+8                                | 2.6 E+6                                          | 5.3 E+7                                            | 6.4 E+6                                           | 3.4 E+7                                            | ≤6.2E+5                                            |
| <b>KB1_4</b>               | 3.8E+5                            | 7.4E+5                                       | 5.0E+8            | 7.3E+5                                        | 2.5E+6                                         | ≤8.3E+5                       | 4.0E+10            | 3.1E+8                                | 4.4E+6                                           | 4.6E+7                                             | 8.4E+6                                            | 5.0E+7                                             | ≤8.3E+5                                            |
| <i>bvcA</i>                | 4.4E+5                            | 5.0E+5                                       | ≤1.0 E+6          | 1.1E+5                                        | 1.6E+6                                         | ≤3.4E+5                       | 3.2E+8             | ≤3.4E+5                               | 2.1E+6                                           | 1.1E+8                                             | 2.1E+7                                            | 6.5E+7                                             | ≤3.4E+5                                            |
| <b>KB1_11</b>              | ≤2.4 E+5                          | 7.7E+5                                       | 7.1E+7            | 3.6E+5                                        | 2.9E+6                                         | ≤9.6E+5                       | 2.6E+10            | 9.2E+7                                | 9.7E+5                                           | 6.4E+6                                             | ≤9.7E+5                                           | ≤9.7E+5                                            | ≤9.7E+5                                            |
| <b>KB1_12</b>              | ≤1.8 E+5                          | 9.0E+4                                       | 2.2E+9            | 1.3E+5                                        | 5.1E+4                                         | ≤4.6E+5                       | 5.6E+10            | 1.2E+8                                | ≤4.6E+5                                          | 5.9E+6                                             | ≤4.6E+5                                           | 1.8E+6                                             | ≤4.6E+5                                            |
| <i>vcrA</i>                | ≤6.2 E+4                          | 1.4E+6                                       | 7.1E+8            | 7.9E+5                                        | 1.1E+6                                         | ≤4.2E+5                       | 7.5E+10            | 3.2E+8                                | 2.E+6                                            | 4.4E+7                                             | ≤8.1E+3                                           | 1.1E+7                                             | ≤8.1E+3                                            |
| <b>KB1_15</b>              | ≤6.0 E+4                          | 7.7E+5                                       | 8.9E+05           | 3.5E+5                                        | 1.9E+6                                         | ≤2.8E+4                       | 7.6E+8             | 6.5E+4                                | ≤2.8E+4                                          | 2.1E+6                                             | ≤2.8E+4                                           | 8.8E+5                                             | ≤2.8E+4                                            |
| <b>KB1_16</b>              | ≤1.8 E+5                          | 1.3E+5                                       | ≤8.7E+5           | 7.1E+4                                        | 3.8E+5                                         | ≤5.8E+5                       | ≤8.7E+5            | ≤5.8E+5                               | ≤5.8E+5                                          | 3.1E+6                                             | ≤5.8E+5                                           | ≤5.8E+5                                            | ≤5.8E+5                                            |
| <b>KB1_17</b>              | ≤2.4 E+5                          | 4.7E+4                                       | ≤5.0E+5           | 2.3E+4                                        | 2.5E+5                                         | ≤3.2E+4                       | ≤5.0E+5            | ≤3.2E+4                               | ≤3.2E+4                                          | 2.4E+6                                             | ≤3.2E+4                                           | 6.5E+5                                             | ≤3.2E+4                                            |
| <b>KB1_18</b>              | ≤6.0 E+4                          | 4.8E+5                                       | ≤1.0E+6           | 2.1E+5                                        | 8.9E+5                                         | ≤4.8E+5                       | 6.3E+8             | ≤4.8E+5                               | ≤4.8E+5                                          | 2.3E+6                                             | ≤4.8E+5                                           | 3.2E+6                                             | ≤4.8E+5                                            |
| <b>KB1_19</b>              | ≤1.7 E+5                          | 2.1E+5                                       | 9.1E+05           | 1.0E+5                                        | 2.6E+5                                         | ≤6.1E+5                       | 1.3E+8             | 4.2E+6                                | 1.5E+6                                           | 2.9E+6                                             | 1.2E+6                                            | 1.2E+7                                             | ≤6.1E+5                                            |
| <b>KB1_23</b>              | ≤1.8 E+5                          | 7.0E+4                                       | 5.3E+8            | 3.6E+4                                        | 3.3E+5                                         | ≤7.3E+5                       | 3.7E+10            | 2.6E+8                                | ≤7.3E+5                                          | ≤7.3E+5                                            | ≤7.3E+5                                           | ≤7.3E+5                                            | ≤7.3E+5                                            |
| <b>KB1_25</b>              | ≤7.0E+4                           | 3.0E+3                                       | ≤8.2E+5           | 3.0E+3                                        | 2.0E+5                                         | ≤3.2E+4                       | ≤8.2E+5            | ≤3.2E+4                               | 1.9E+5                                           | 5.8E+6                                             | 1.6E+6                                            | 3.6E+6                                             | ≤8.2E+2                                            |
| <i>Geo 16S</i>             | NA                                | NA                                           | ≤1.1E+6           | NA                                            | NA                                             | ≤4.1E+4                       | 5.0E+9             | 7.7E+6                                | ≤4.1E+4                                          | ≤4.1E+4                                            | ≤4.1E+4                                           | ≤4.1E+4                                            | 3.0E+5                                             |
| <i>Geo rdhA</i>            | NA                                | NA                                           | ≤4.6E+5           | NA                                            | NA                                             | ≤2.1E+4                       | 6.6E+9             | 4.0E+7                                | ≤2.1E+4                                          | 1.7E+5                                             | ≤2.1E+4                                           | ≤2.1E+4                                            | 2.1E+6                                             |

*Dhc* = *Dehalococcoides*; inoc. = inoculum; mo. = month; mos. = months; NA = not analyzed; prebiost = prebiostimulation; prebioaug = prebioaugmentation; postbioaug = postbioaugmentation. ≤ MDL

Note 1: The difference between duplicate measurements was usually around 5% or less of the absolute value of each duplicate measurement.

Note 2: Prior to any treatment *Dhc* counts were below the method detection limit in all wells, except in effluent where they were 1E+5 gene copies per L.

Note 3: *Dhc* and *rdhA* counts for SW75 and EFF at month 10 were below the MDL (data not shown in Table above)

**Table S9.** Detection limits for the quantification via qPCR of the 16S rRNA genes of *Dehalococcoides*, *Geobacter* and the *rdhA* genes for different sample batches (field samples and lab cultures).

|                 | SABRE                       | ISSO prebiostim             | ISSO postbiostim and postbioaug | KB-1 cultures and inoculum   |
|-----------------|-----------------------------|-----------------------------|---------------------------------|------------------------------|
|                 | Gene copies L <sup>-1</sup> | Gene copies L <sup>-1</sup> | Gene copies L <sup>-1</sup>     | Gene copies mL <sup>-1</sup> |
| <i>Dhc 16S</i>  | 6.2E+5                      | 7.1E+4                      | 3.1E+3                          | 8.9E+2                       |
| <b>KB1_1</b>    | NA                          | NA                          | NA                              | 3.6E+2                       |
| <b>KB1_4</b>    | 8.3E+5                      | 2.1E+5                      | 1.4E+4                          | 1.1E+3                       |
| <b>KB1_5</b>    | NA                          | NA                          | NA                              | 7.4E+2                       |
| <b>KB1_6</b>    | 3.4E+5                      | 4.8E+4                      | 2.2E+3                          | 1.0E+3                       |
| <b>KB1_11</b>   | 9.7E+5                      | 2.4E+5                      | 1.5E+4                          | 1.1E+3                       |
| <b>rdhA12</b>   | 4.6E+5                      | 1.8E+5                      | 1.1E+4                          | 4.2E+2                       |
| <b>KB1_14</b>   | 4.2E+5                      | 6.2E+4                      | 8.1E+3                          | 6.8E+2                       |
| <b>KB1_15</b>   | 2.8E+4                      | 6.0E+4                      | 6.4E+3                          | 8.9E+2                       |
| <b>KB1_16</b>   | 5.8E+5                      | 1.8E+5                      | 1.2E+4                          | 8.7E+2                       |
| <b>KB1_17</b>   | 3.2E+4                      | 2.4E+5                      | 5.5E+3                          | 5.0E+2                       |
| <b>KB1_18</b>   | 4.8E+5                      | 6.0E+4                      | 7.2E+3                          | 1.0E+3                       |
| <b>KB1_19</b>   | 6.1E+5                      | 1.7E+5                      | 8.8E+3                          | 8.2E+2                       |
| <b>KB1_23</b>   | 7.3E+5                      | 1.8E+5                      | 1.5E+4                          | 9.5E+2                       |
| <b>KB1_25</b>   | 3.2E+4                      | 7.0E+4                      | 3.0E+3                          | 8.2E+2                       |
| <b>KB1_27</b>   | NA                          | NA                          | NA                              | 4.6E+2                       |
| <i>Geo 16S</i>  | 4.1E+4                      | NA                          | NA                              | 1.1E+3                       |
| <b>Geo rdhA</b> | 2.1E+4                      | NA                          | NA                              | 4.6E+2                       |

NA = not analyzed; postbioaug = postbioaugmentation; postbiostim = postbiostimulation; prebiostim = prebiostimulation.

Note: Detection limits reflect the extraction volumes used: L for groundwater samples and mL for cultures.

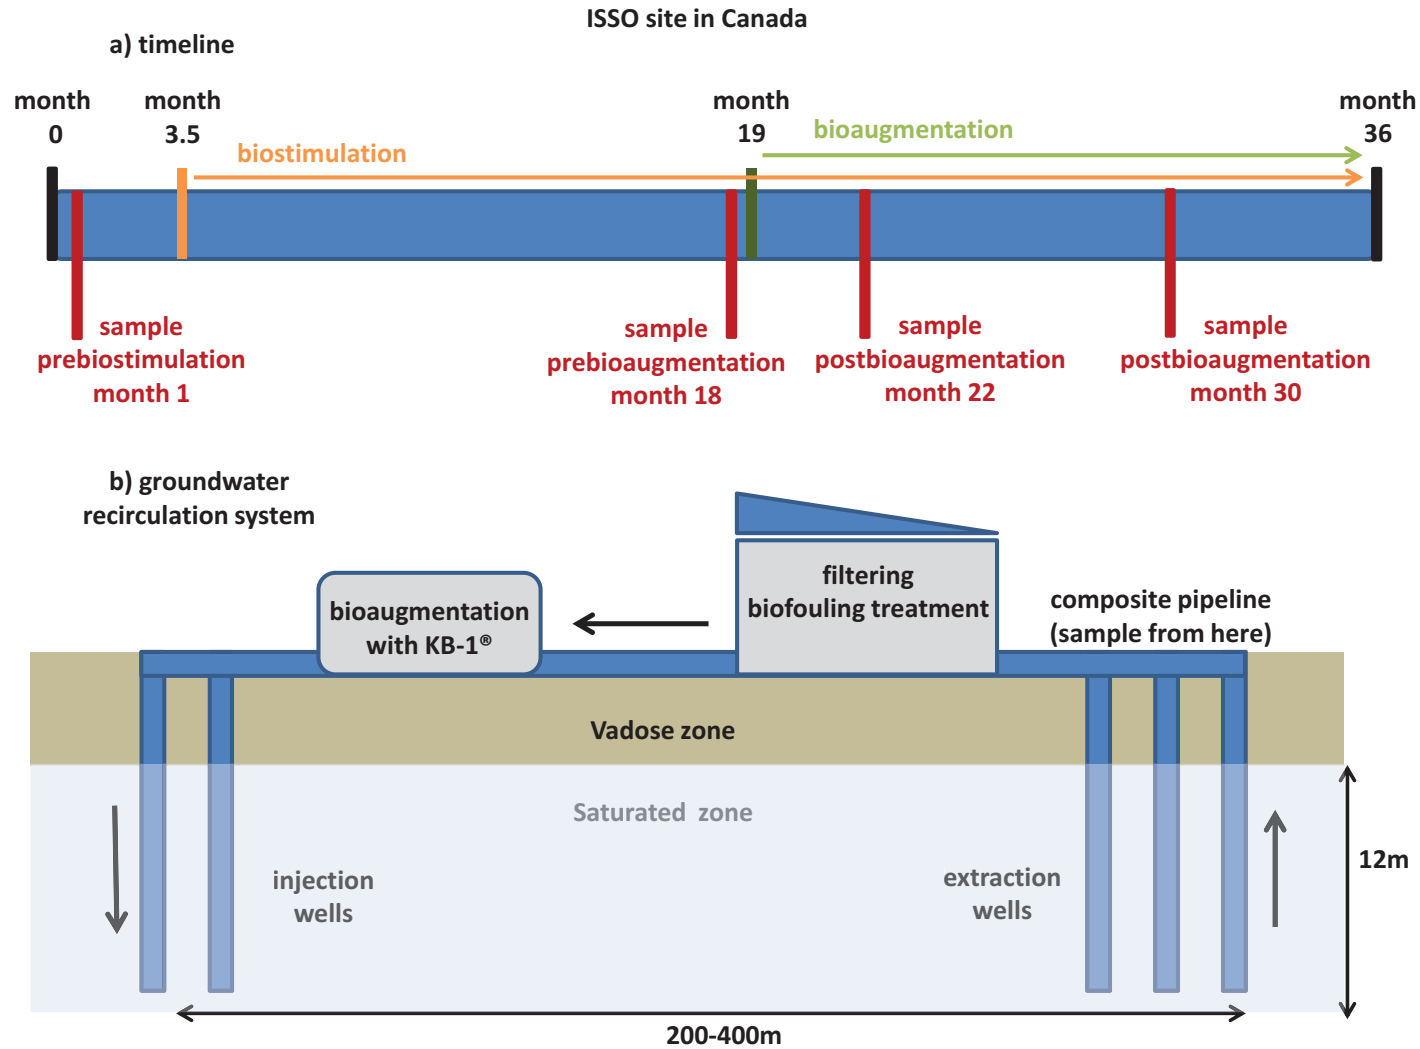

**Figure S1.** The ISSO site in Canada. a) Timeline including sampling dates and other relevant events such as the start of the biostimulation and bioaugmentation phases. b) Frontal section of the site depicting the direction of the groundwater within the recirculation system.

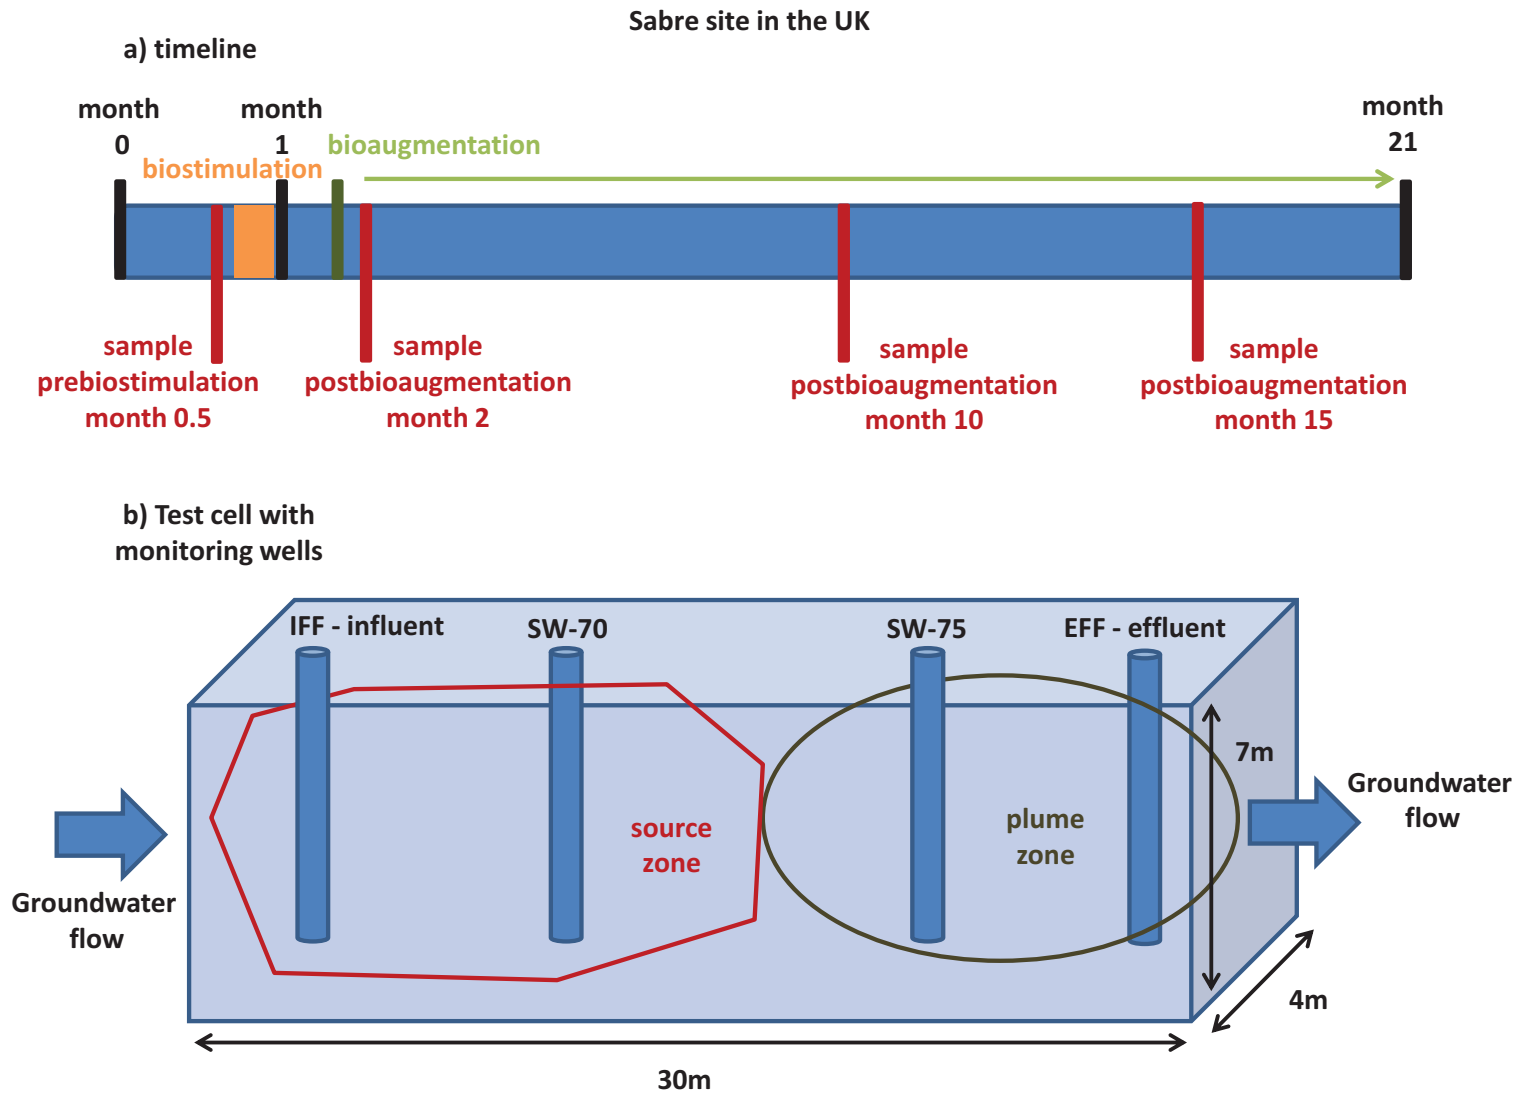

**Figure S2.** The Sabre site in the UK. a) Timeline including sampling dates and other relevant events such as the start of the biostimulation and bioaugmentation phases. b) Sketch of the pilot test cell with sampling locations including four monitoring wells: influent, SW-70, SW-75 and effluent.

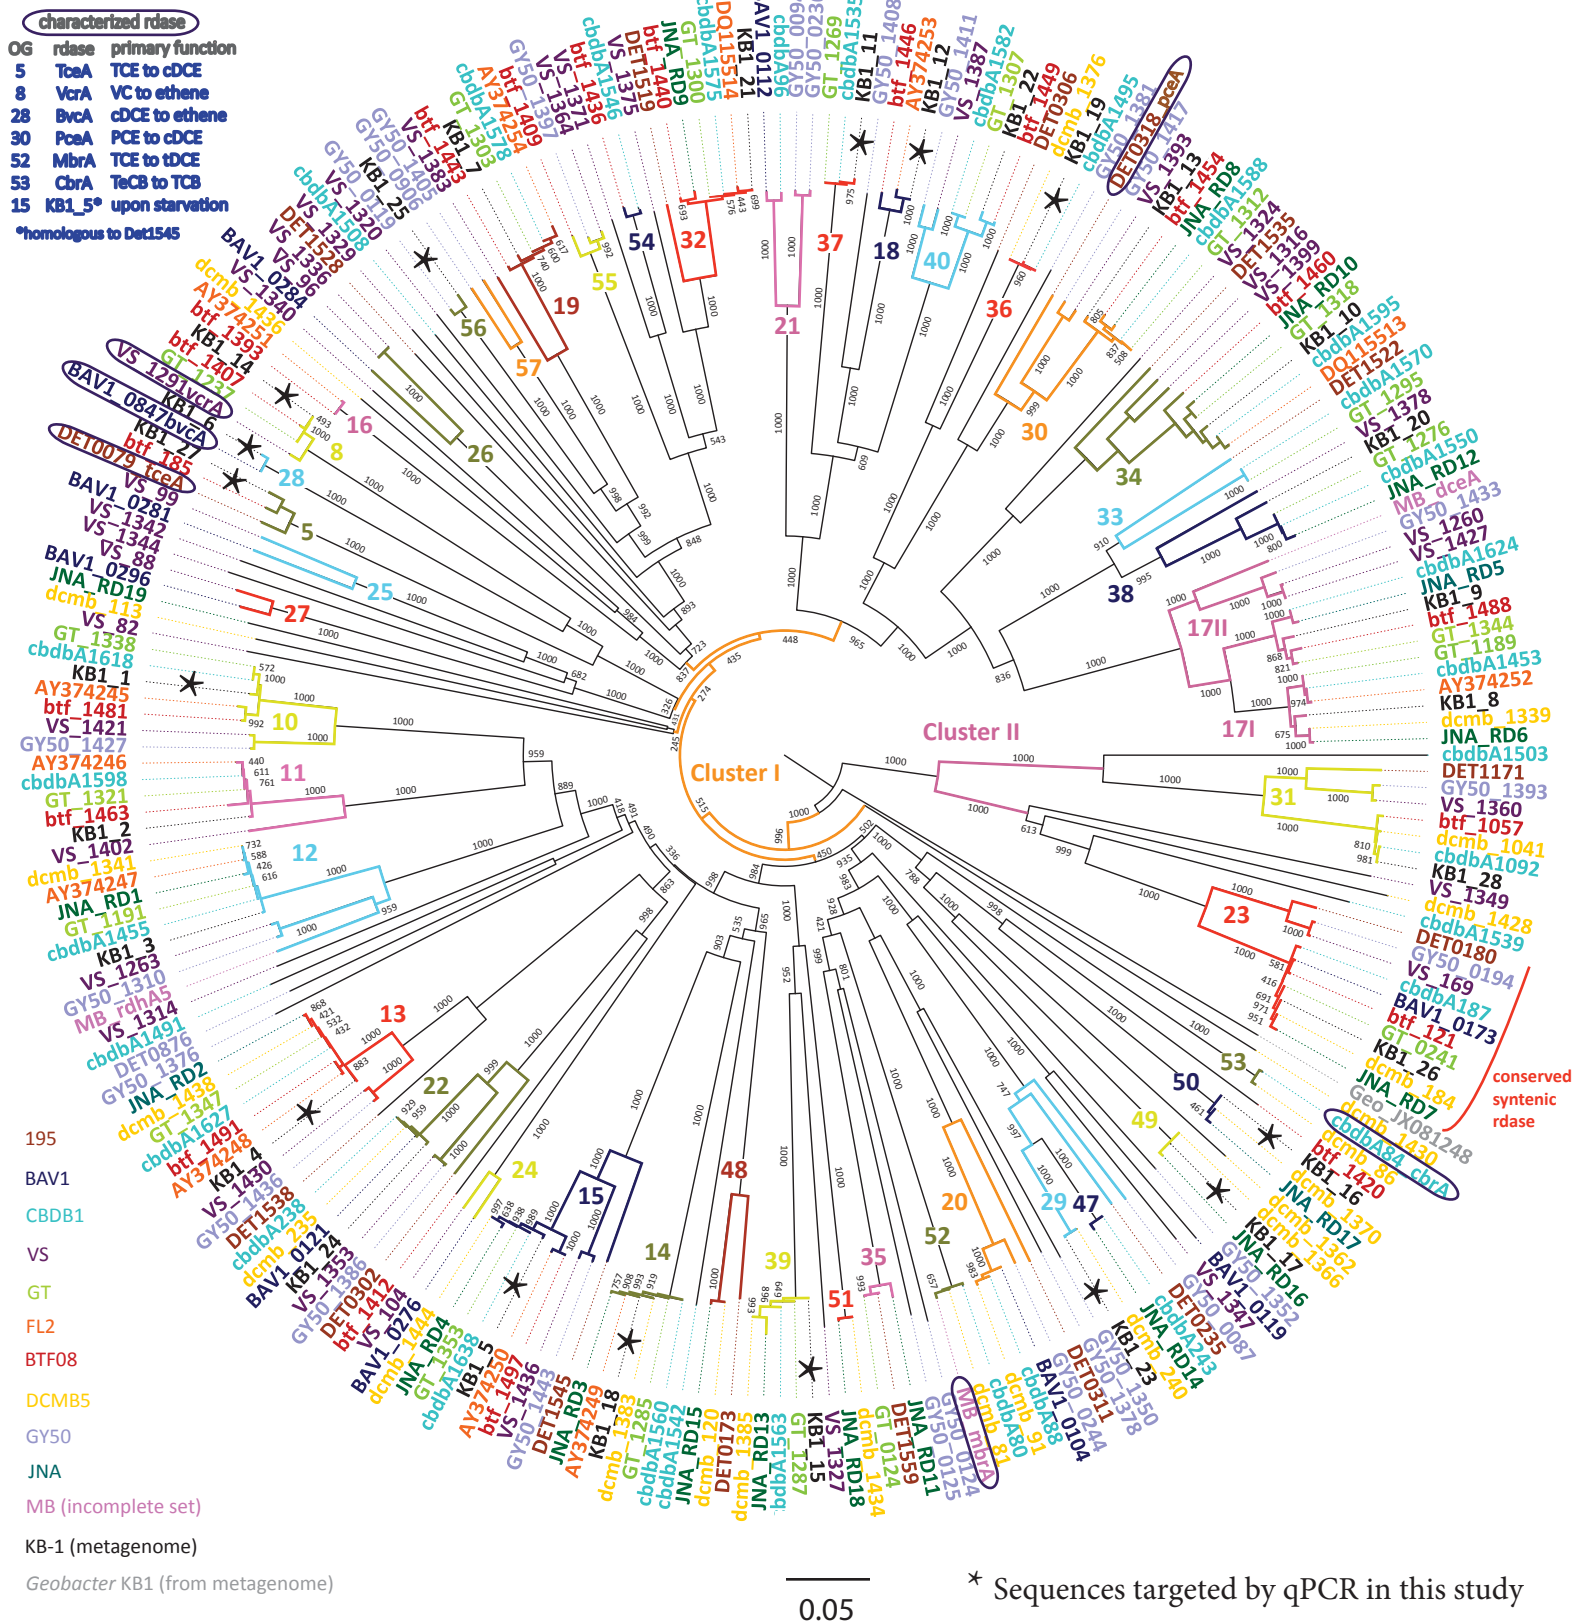

Figure S3. Phylogenetic tree with bootstraps based on the full nucleotide sequences of the *rdhA* genes of eleven isolated *D. mccartyi* strains as well as those found in the mixed dechlorinating culture KB-1, including an *rdhA* gene found in *Geobacter* KB-1. The scale at the bottom of the tree represents the number of substitutions per nucleotide. The numbers in colours represent *rdhA* ortholog groups (OGs). Genbank accession numbers for the nucleotide sequences of the MB strain are as follows: EU625401.1 for MB\_rdhA5, GU120391.1 for mbrA and EU625402 for dceA1.

### References cited in Supporting Information

1. Hug LA, Maphosa F, Leys D, Löffler FE, Smidt H, Edwards EA, Adrian L (2013). Overview of organohalide-respiring bacteria and a proposal for a classification system for reductive dehalogenases. *Phil Trans Royal Soc B: Biol Sci*, 368(1616): 20120322.
2. Tang S, Chan WW, Fletcher KE, Liang X, Seifert J, Löffler FE, Edwards EA. 2013. Functional characterization of reductive dehalogenases using blue native polyacrylamide gel electrophoresis. *Appl Environ Microbiol* 79(3):974–981.
3. Duhamel M, Edwards EA. Microbial composition of chlorinated ethene-degrading cultures dominated by *Dehalococcoides*. *FEMS Microbiol Ecol* 26(58): 538–549.
4. Waller AS, Krajmalnik-Brown R. Löffler FE, Edwards EA. Multiple reductive-dehalogenase-homologous genes are simultaneously transcribed during dechlorination by *Dehalococcoides*-containing cultures. *Appl Environ Microbiol* 71: 8257–8264.
5. Fung JM, Morris RM, Adrian L, Zinder SH. Expression of reductive dehalogenase genes in *Dehalococcoides ethenogenes* strain 195 growing on tetrachloroethene, trichloroethene, or 2,3-dichlorophenol. *Appl Environ Microbiol* 73: 4439-45.
